# Supplementary material for: A phytochemical-based medication search for the SARS-CoV-2 infection by molecular docking models towards spike glycoproteins and main proteases
Source: Royal Society of Chemistry journal article supplement (doi:10.1039/d0ra10458b), 2021-01-01
Supplement: d0ra10458b1.pdf [file d0ra10458b1.pdf]

## **Supplementary Materials**

### **Searching Phytochemical based Medication for SARS-CoV-2 infection by Molecular docking models towards Spike glycoprotein and Main Protease**

Anju Choorakottayil Pushkaran<sup>1</sup>, Prajeesh Nath EN<sup>2</sup>, Anu R Melge<sup>1</sup>, Rammanohar Puthiyedath<sup>2</sup>,  
C Gopi Mohan<sup>1\*</sup>

<sup>1</sup>Computational Biology and Bioinformatics Lab, Center for Nanosciences and Molecular Medicine,  
Amrita Vishwa Vidyapeetham, Kochi 682041, Kerala, India.

<sup>2</sup>Amrita School of Ayurveda, Amrita Vishwa Vidyapeetham, Kollam 690525, Kerala, India.

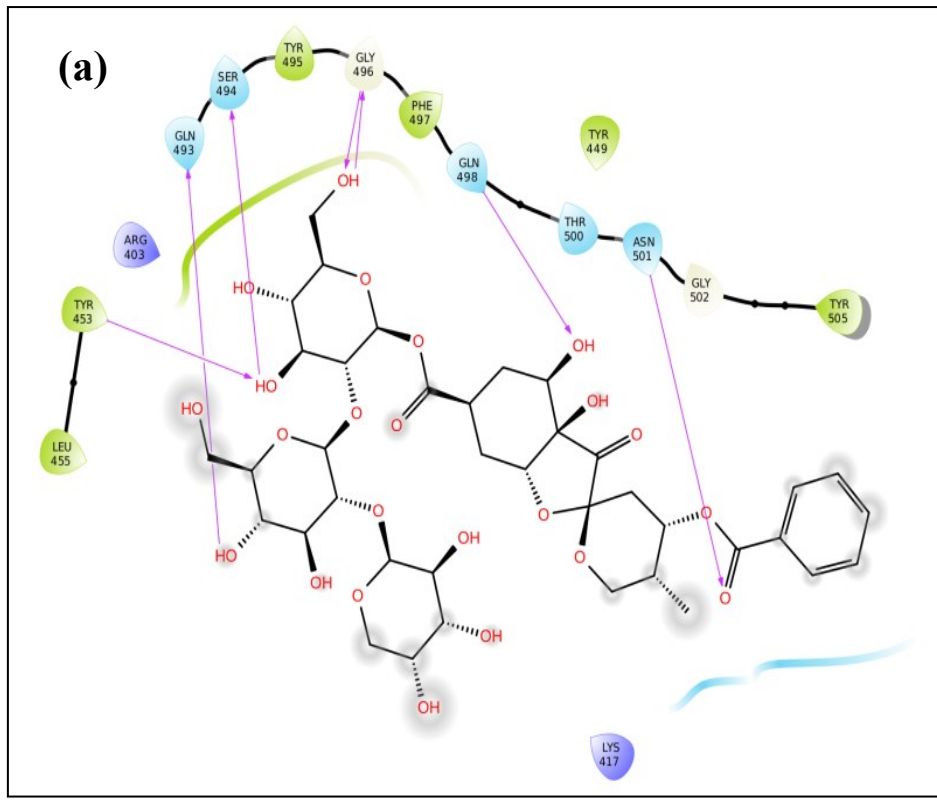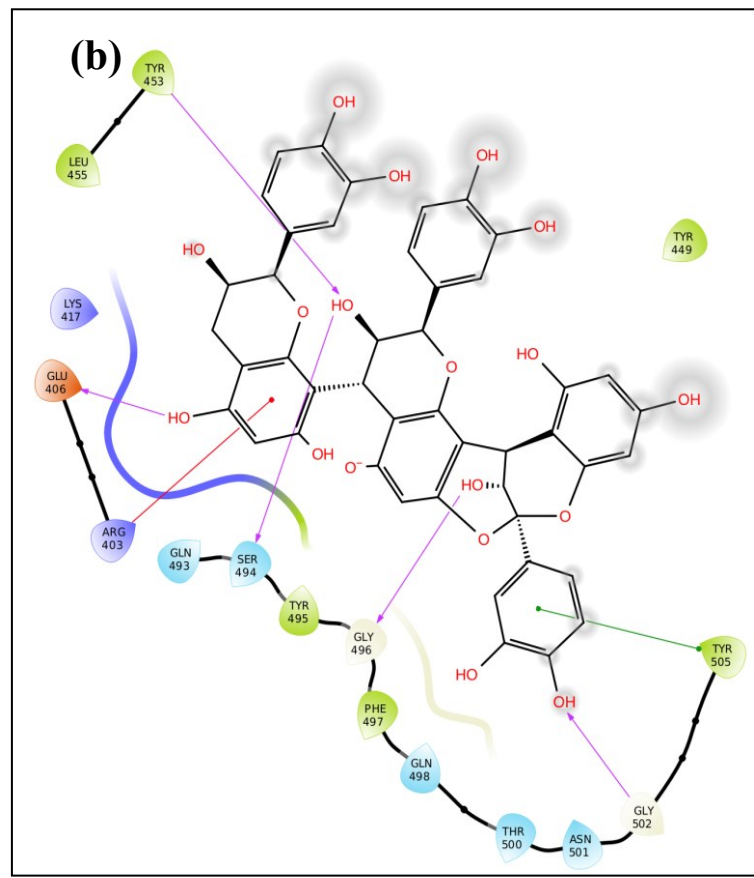

**Figure S1.** 2D interaction plot of (a) Phyllaemblicin C compound with the RBD domain of spike protein (b) Cinnamtannin B1 compound with the RBD domain of spike protein.

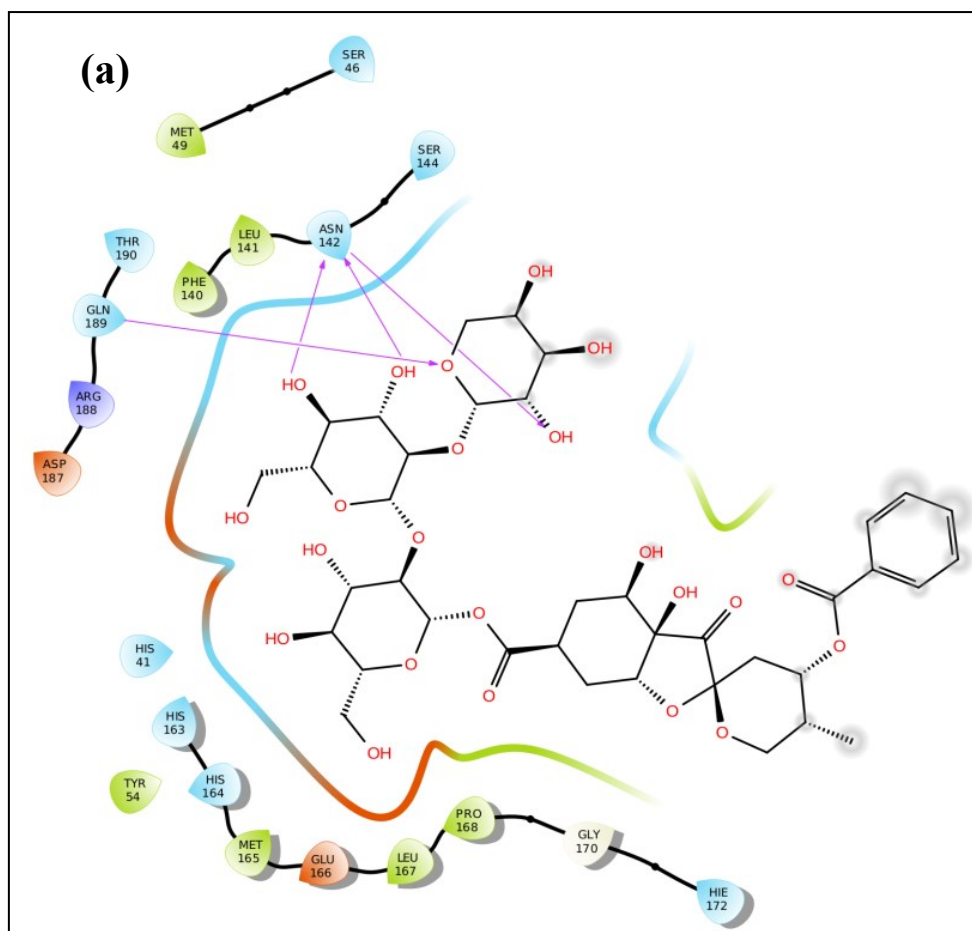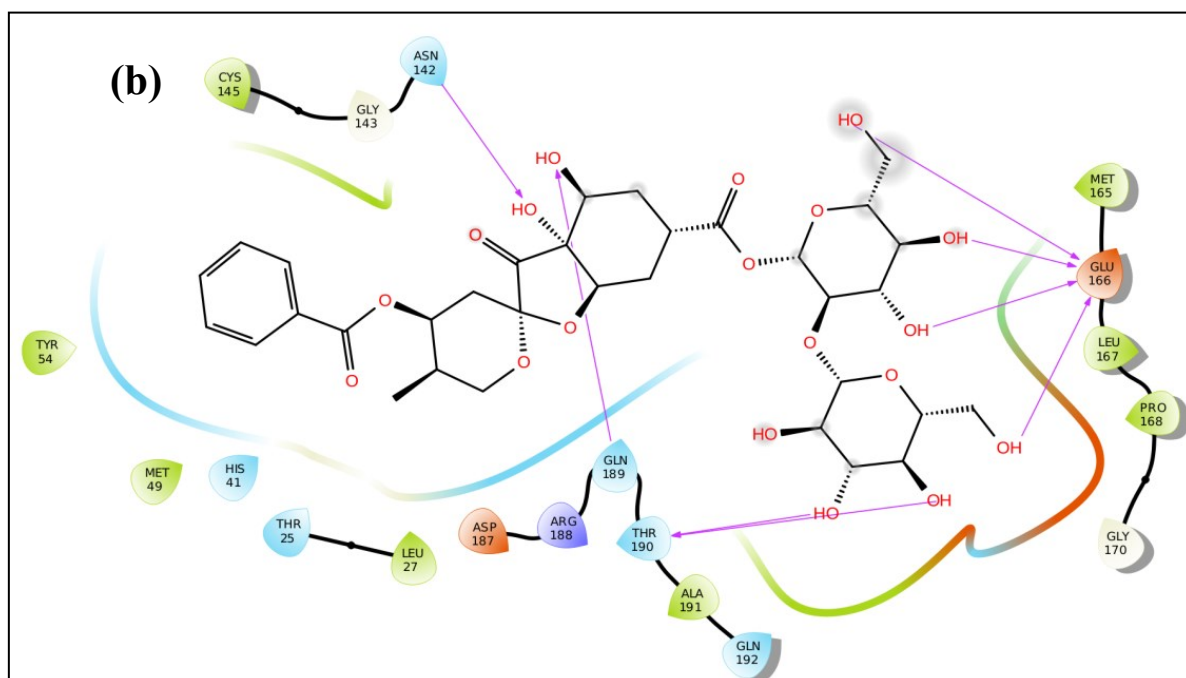

**Figure S2.** 2D interaction plot of (a) Phyllaemblicin C with the  $M^{\text{pro}}$  protein and (b) Phyllaemblicin B with the  $M^{\text{pro}}$  protein.

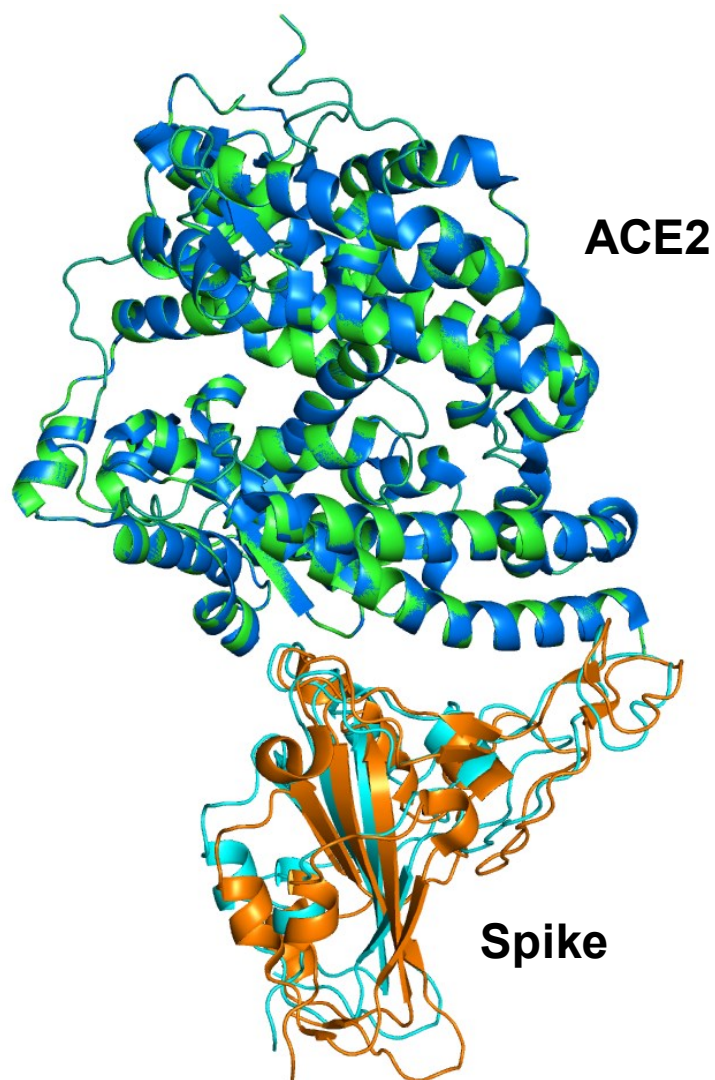

**Figure S3.** Three dimensional structure alignment of the docked pose of the RBD domain of SARS-CoV-2 Spike protein and human ACE2 receptor from ZDOCK software with the corresponding crystal structure complex (PDB id: 6M0J). The RBD of spike protein in the docked pose and crystal structure is shown as cyan and orange cartoon respectively. Human ACE2 receptor protein is shown in green and blue color respectively.

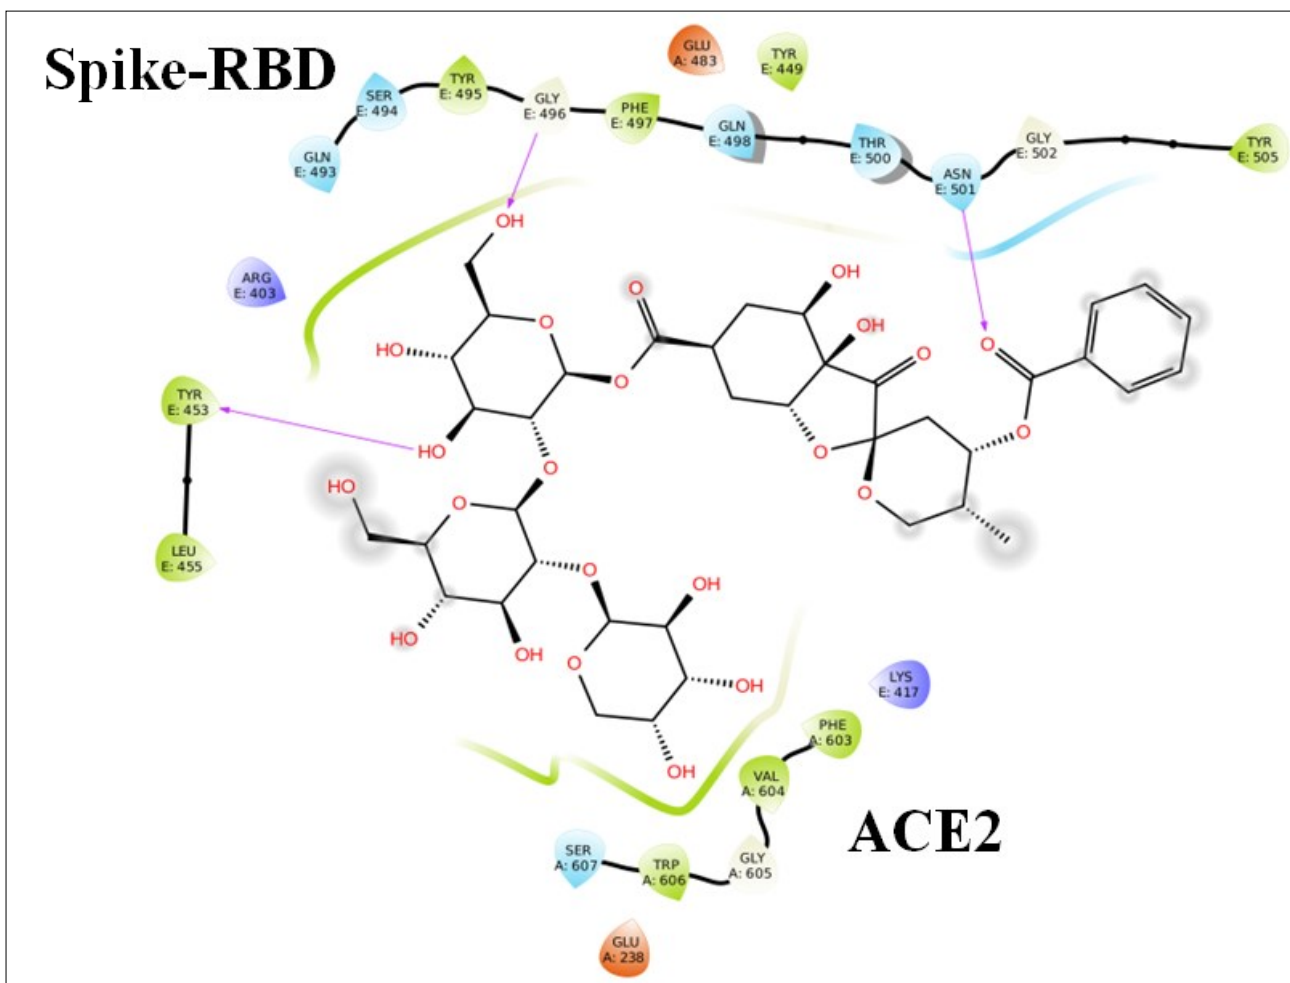

**Figure S4:** 2D interaction diagram of human ACE2 receptor in complex with RBD spike protein with bound phytochemical Phyllaemblicin C.

**Table S1:** The binding affinity of the phytochemical compounds towards the SARS-CoV-2 spike protein and M protease.

| <b>Protein target</b> | <b>Compounds</b>  | <b>Binding affinity (kcal/mol)</b> |
|-----------------------|-------------------|------------------------------------|
| <b>Spike protein</b>  | Phyllaemblicin C  | -9.131                             |
|                       | Cinnamtannin B1   | -9.008                             |
|                       | Phyllaemblicins B | -7.381                             |
|                       | Procyanidine B1   | -6.275                             |
|                       | Procyanidine A2   | -5.023                             |
|                       | Embelin           | -4.200                             |
|                       | Vasicine          | -3.867                             |
|                       | Germacron         | -3.095                             |
| <b>Main protease</b>  | Phyllaemblicin C  | -9.723                             |
|                       | Phyllaemblicins B | -9.151                             |
|                       | Procyanidine B1   | -9.151                             |
|                       | Cinnamtannin B1   | -8.385                             |
|                       | Procyanidine A2   | -7.105                             |
|                       | Vasicine          | -3.220                             |
|                       | Embelin           | -3.187                             |
|                       | Germacron         | -2.143                             |

**Table S2:** Interacting distance of the three best phytochemical compounds towards SARS-CoV-2 active site residues of spike protein (RBD) and Main protease.

| SARS-CoV-2 target   | Phytochemicals   | Distance (Å)       | Interacting amino acid residues |
|---------------------|------------------|--------------------|---------------------------------|
| Spike protein (RBD) | Phyllaemblicin C | 1.89               | <u><b>Y453</b></u>              |
|                     |                  | 1.93               | <u><b>G496</b></u>              |
|                     |                  | 1.81               | <u><b>Q498</b></u>              |
|                     |                  | 2.05               | <u><b>N501</b></u>              |
|                     |                  | 2.79               | <u><b>Y449</b></u>              |
|                     |                  | 2.17               | S494                            |
|                     |                  | 1.86               | <u><b>Q493</b></u>              |
|                     |                  | 3.90               | <u><b>T500</b></u>              |
|                     |                  | 5.00               | <u><b>Y505</b></u>              |
|                     |                  | 5.63               | F497                            |
|                     |                  | 4.58               | R403                            |
|                     |                  | 4.79               | Y495                            |
|                     |                  | 4.23               | <u><b>L455</b></u>              |
|                     |                  | 2.80               | <u><b>Q493</b></u>              |
|                     |                  | 6.30               | <u><b>K417</b></u>              |
|                     | Cinnamtannin B1  | 4.71               | R403                            |
|                     |                  | 1.90               | <u><b>Y453</b></u>              |
|                     |                  | 2.13               | <u><b>G502</b></u>              |
|                     |                  | 1.94               | <u><b>G496</b></u>              |
|                     |                  | 2.60               | <u><b>Q498</b></u>              |
|                     |                  | 2.36               | S494                            |
|                     |                  | 1.86               | Q406                            |
|                     |                  | 2.87               | <u><b>Q493</b></u>              |
|                     |                  | 3.07               | <u><b>Y505</b></u>              |
|                     |                  | 4.52               | <u><b>N501</b></u>              |
|                     |                  | 4.76               | Y495                            |
|                     |                  | 5.48               | Y449                            |
|                     | 5.10             | <u><b>K417</b></u> |                                 |
|                     | 5.14             | F497               |                                 |
|                     | Phyllaemblicin B | 2.16               | R403                            |
| 1.81                |                  | Q409               |                                 |
| 2.10                |                  | <u><b>K417</b></u> |                                 |
| 2.17                |                  | <u><b>Y453</b></u> |                                 |
| 2.00                |                  | <u><b>Y505</b></u> |                                 |
| 2.98                |                  | D405               |                                 |

|                                      |                  |                    |                    |
|--------------------------------------|------------------|--------------------|--------------------|
|                                      |                  | 1.59               | Q406               |
|                                      |                  | 4.94               | Y495               |
| Main protease<br>(M <sup>pro</sup> ) | Phyllaemblicin C | 2.18               | N142               |
|                                      |                  | 1.73               | <b><u>Q189</u></b> |
|                                      |                  | 2.69               | E166               |
|                                      |                  | 2.69               | <b><u>H164</u></b> |
|                                      |                  | 2.66               | <b><u>H163</u></b> |
|                                      |                  | 2.76               | <b><u>P168</u></b> |
|                                      |                  | 2.44               | <b><u>H41</u></b>  |
|                                      |                  | 4.92               | <b><u>L167</u></b> |
|                                      |                  | 4.89               | <b><u>Q192</u></b> |
|                                      |                  | 3.10               | <b><u>M165</u></b> |
|                                      |                  | 4.71               | <b><u>C145</u></b> |
|                                      |                  | 4.90               | <b><u>Y54</u></b>  |
|                                      |                  | 3.72               | <b><u>M49</u></b>  |
|                                      |                  | 2.74               | <b><u>Q189</u></b> |
|                                      | Phyllaemblicin B | 2.22               | N142               |
|                                      |                  | 2.19               | <b><u>Q189</u></b> |
|                                      |                  | 2.86               | E166               |
|                                      |                  | 3.07               | <b><u>L167</u></b> |
|                                      |                  | 1.82               | <b><u>T190</u></b> |
|                                      |                  | 2.68               | <b><u>P168</u></b> |
|                                      |                  | 3.18               | <b><u>C145</u></b> |
|                                      |                  | 2.5                | <b><u>H41</u></b>  |
|                                      |                  | 5.06               | <b><u>M49</u></b>  |
|                                      |                  | 5.34               | <b><u>M165</u></b> |
|                                      | Procyanidine B1  | 1.98               | E166               |
|                                      |                  | 2.15               | N142               |
|                                      |                  | 1.80               | <b><u>T190</u></b> |
|                                      |                  | 2.19               | <b><u>H164</u></b> |
|                                      |                  | 1.85               | F140               |
|                                      |                  | 3.25               | <b><u>Q189</u></b> |
| 2.42                                 |                  | <b><u>H41</u></b>  |                    |
| 4.80                                 |                  | <b><u>P168</u></b> |                    |
| 4.46                                 |                  | <b><u>M165</u></b> |                    |



**Table S3:** Interaction between amino acid of the docked complexes of RBD of SARS-CoV-2 spike protein and human ACE2 receptor and RBD of SARS-CoV-2 spike protein in complex with Phyllaemblicin C phytochemical with human ACE2 receptor.

| Interacting amino acid pairs in the docked complex of Spike protein – human ACE2 |              | Interacting amino acid pairs in the docked complex of Spike protein:Phyllaemblicin C – human ACE2 |                         |
|----------------------------------------------------------------------------------|--------------|---------------------------------------------------------------------------------------------------|-------------------------|
| RBD of Spike protein                                                             | Human ACE2   | RBD of Spike protein                                                                              | Human ACE2 <sup>a</sup> |
| Y 489                                                                            | <b>Q 24</b>  | N 487                                                                                             | M 249                   |
| G 476                                                                            | S 19         | D 420                                                                                             | F 592                   |
| V 503                                                                            | G 354        | T 415                                                                                             | P 235                   |
| L 455                                                                            | <b>D 30</b>  | T 415                                                                                             | K 596                   |
| F 486                                                                            | M 82         | Y 505                                                                                             | E 231                   |
| F 456                                                                            | K 26         | K 458                                                                                             | D 597                   |
| Q 498                                                                            | <b>Y 41</b>  | Y 489                                                                                             | S 257                   |
| Y 473                                                                            | T 27         | F 456                                                                                             | S 602                   |
| Y 449                                                                            | <b>D 38</b>  | R 408                                                                                             | H 228                   |
| N 487                                                                            | <b>Y 83</b>  | G 504                                                                                             | E 231                   |
| Y 505                                                                            | D 355        | K 417                                                                                             | H 239                   |
| F 456                                                                            | <b>D 30</b>  | S 459                                                                                             | K 600                   |
| V 503                                                                            | T 324        | G 485                                                                                             | I 259                   |
| Y 505                                                                            | <b>R 393</b> | Y 489                                                                                             | S 602                   |
| T 500                                                                            | G 326        | Y 473                                                                                             | N 601                   |
| N 487                                                                            | F 28         | Y 473                                                                                             | F 603                   |
| N 501                                                                            | G 354        | D 420                                                                                             | K 596                   |
| N 501                                                                            | D 355        | F 456                                                                                             | G 605                   |
| A 475                                                                            | F 28         | R 408                                                                                             | E 231                   |
| T 500                                                                            | <b>Y 41</b>  | Y 421                                                                                             | V 604                   |
| G 502                                                                            | G 326        | Y 489                                                                                             | I 259                   |
| L 455                                                                            | H 34         | K 417                                                                                             | E 238                   |
| N 487                                                                            | <b>Q 24</b>  | L 455                                                                                             | E 238                   |
| Y 449                                                                            | <b>K 353</b> | L 455                                                                                             | G 605                   |
| F 486                                                                            | <b>Y 83</b>  | A 475                                                                                             | N 601                   |
| R 403                                                                            | <b>E 37</b>  | G 476                                                                                             | N 601                   |
| V 503                                                                            | <b>Q 325</b> | R 457                                                                                             | N 599                   |
| Y 449                                                                            | <b>Q 42</b>  | R 457                                                                                             | K 596                   |
| F 486                                                                            | L 79         | F 486                                                                                             | M 249                   |
| N 487                                                                            | T 27         | K 417                                                                                             | P 235                   |
| G 446                                                                            | <b>Q 42</b>  | R 408                                                                                             | E 232                   |
| F 486                                                                            | <b>Q 24</b>  | G 413                                                                                             | E 589                   |
| N 501                                                                            | G 352        | T 415                                                                                             | F 592                   |
| T 500                                                                            | D 355        | G 416                                                                                             | F 592                   |

|       |              |       |       |
|-------|--------------|-------|-------|
| P 499 | <b>N 330</b> | A 475 | K 600 |
| A 475 | E 23         | Y 421 | K 600 |
| F 456 | H 34         | Y 473 | S 602 |
| T 500 | R 357        | D 405 | E 231 |
| N 501 | <b>K 353</b> | Y 421 | N 599 |
| N 501 | G 326        | N 460 | T 593 |
| G 502 | G 354        | F 456 | F 603 |
| T 500 | L 45         | N 487 | P 258 |
| N 487 | A 25         | Q 474 | N 601 |
| Y 489 | T 27         | G 485 | P 258 |
| G 504 | G 354        | Y 473 | N 599 |
| T 505 | G 354        | T 415 | T 593 |
| Y 421 | <b>D 30</b>  | F 486 | I 256 |
| Q 498 | <b>Q 42</b>  | G 476 | S 602 |
| G 502 | <b>K 353</b> | R 403 | E 231 |
| Y 489 | <b>Y 83</b>  | D 405 | K 234 |
| Y 505 | A 386        | Q 474 | K 600 |
| G 496 | <b>D 38</b>  | Q 406 | E 231 |
| Y 505 | G 352        | Q 409 | P 235 |
| A 475 | <b>Q 24</b>  | K 417 | G 605 |
| Q 506 | G 326        | D 405 | E 227 |
| Y 489 | F 28         | Y 473 | K 600 |
| P 499 | <b>Q 329</b> | G 416 | K 596 |
| Q 493 | K 31         | L 455 | F 603 |
| Y 495 | <b>K 353</b> | K 458 | N 601 |
| F 456 | L 29         | F 486 | S 257 |
| Q 493 | H 34         | Y 505 | K 234 |
| Q 506 | <b>Q 329</b> | A 475 | F 603 |
| E 484 | K 31         | R 403 | K 234 |
| V 503 | G 326        | L 455 | V 604 |
| Q 474 | T 27         | Y 421 | H 239 |
| F 456 | K 31         | K 417 | V 604 |
| A 475 | T 20         | D 405 | H 228 |
| Y 505 | <b>E 37</b>  | N 487 | N 601 |
| S 477 | S 19         | F 456 | V 604 |
| Q 498 | <b>D 38</b>  | Q 474 | S 602 |
| K 417 | H 34         | G 493 | F 603 |
| A 475 | S 19         | R 457 | K 600 |
| Q 498 | L 45         | F 486 | P 253 |
| G 502 | D 355        | A 475 | S 602 |
| L 455 | K 31         | N 487 | I 259 |
| F 456 | T 27         | Y 489 | V 604 |

|       |              |       |       |
|-------|--------------|-------|-------|
| G 476 | <b>Q 24</b>  | T 415 | E 589 |
| Y 453 | H 34         | K 458 | K 600 |
| F 497 | <b>K 353</b> | Y 489 | F 603 |
| Y 505 | <b>K 353</b> | Y 421 | K 596 |
| A 475 | T 27         | K 458 | K 596 |
| G 504 | <b>K 353</b> | S 459 | D 597 |
| Q 493 | <b>E 35</b>  | F 490 | F 603 |
| N 501 | <b>Y 41</b>  | Y 489 | P 258 |
| Y 489 | K 31         | F 486 | P 258 |
| Q 498 | <b>K 353</b> | Y 473 | V 604 |
| G 502 | F 356        | R 457 | N 601 |
| T 500 | <b>N 330</b> | G 416 | P 235 |
| Q 506 | <b>K 353</b> | Y 473 | Q 598 |
| S 477 | <b>Q 24</b>  | D 420 | H 239 |
| Y 489 | L 29         |       |       |
| G 496 | <b>K 353</b> |       |       |
| K 417 | <b>D 30</b>  |       |       |
| N 501 | <b>N 330</b> |       |       |
| G 502 | T 324        |       |       |

Human ACE2 bold residues are experimentally known to interact directly with the Spike protein of RBD domain<sup>26</sup>, and was in good agreement with present protein-protein docking results.

<sup>a</sup>Human ACE2 protein interacting residues was highly distorted due to Phyllaemblicin C binding at the active site of Spike protein RBD domain. There is a major change in the three dimensional binding regions between Spike-ACE2 natural binding interface showing negligible interactions with the experimentally known active sites<sup>26</sup>.
